# Supplementary material
Source: Springer Nature journal article supplement (https://www.springermedizin.de/resource/supplementary/12895_2013_155_MOESM4_ESM.pdf/9514232)

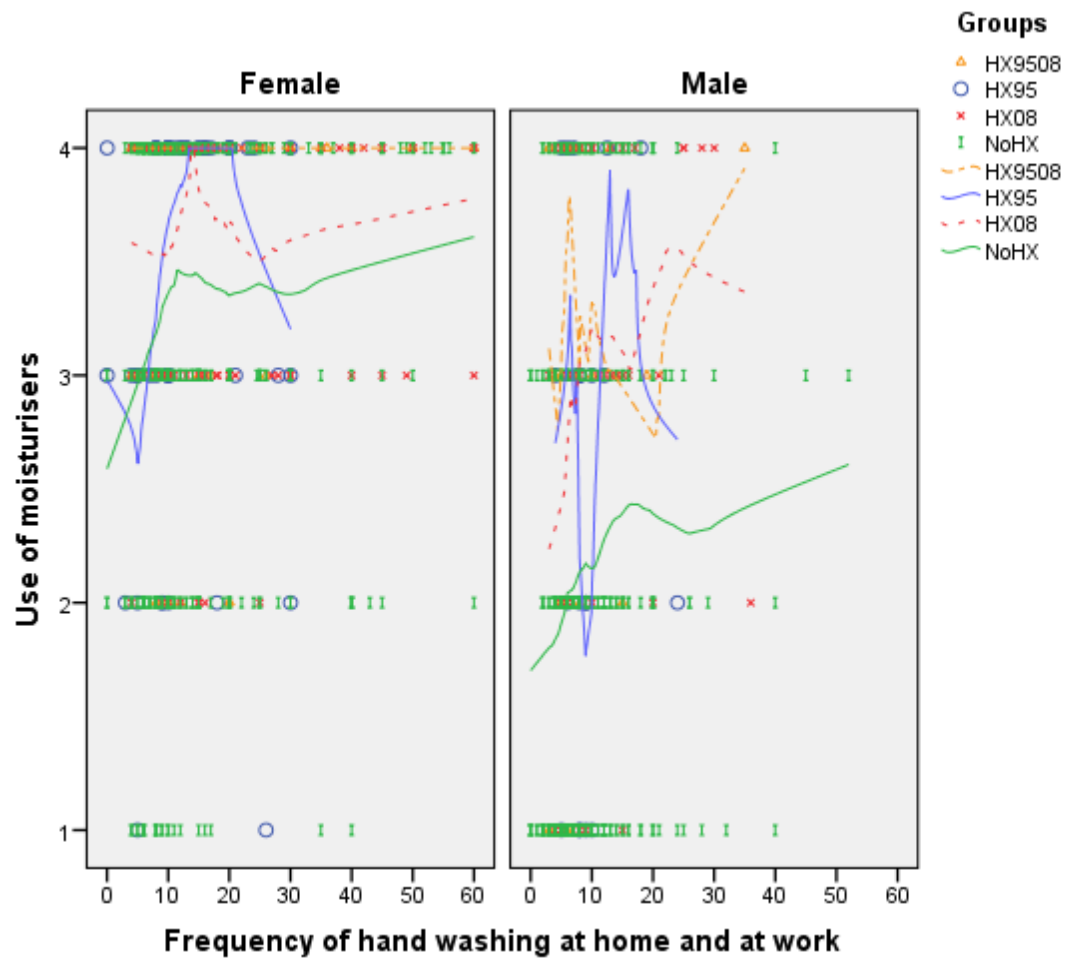

Supplement: MOESM4 [file 9514232]
